# Supplementary material
Source: Research Square preprint supplement (doi:10.21203/rs.3.rs-9039534/v1)
Supplement: Supplementary file 1 [file da20247157b4e53c92a70484.docx]

**Graph 1.** Seasonal range in days by year, Prilep 1951-2024 spring-summer, NHMS, Skopje.

**Graph 2.** Seasonal range in days by year, Prilep 1951-2024 autumn-winter, NHMS, Skopje.

**Graph 3.** Five-year deviations between Spring and Autumn and between Summer and Winter for the period 1951–2025 at the Prilep MMS.
